# Supplementary material
Source: Springer Nature journal article supplement (https://www.springermedizin.de/resource/supplementary/12974_2011_378_MOESM8_ESM.pdf/9601540)

### IL-1 $\alpha$

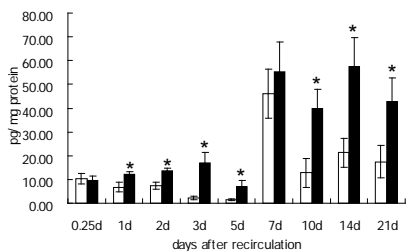

### IL-1 $\beta$

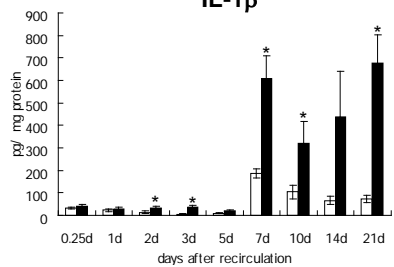

### IL-2

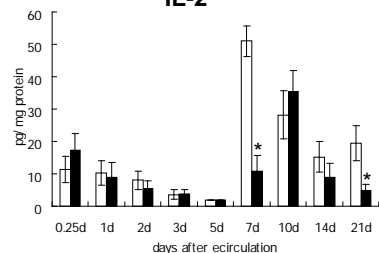

### IL-4

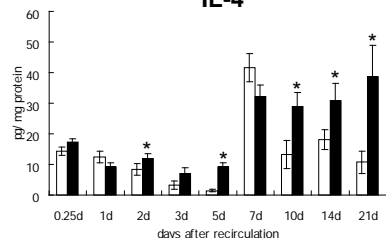

### IL-6

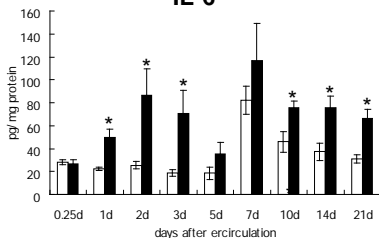

### IL-10

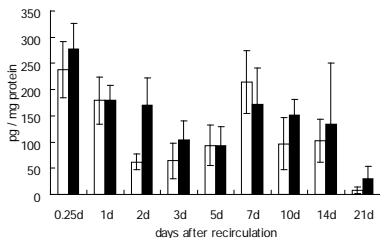

### GM-CSF

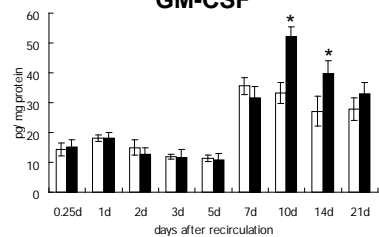

### IFN- $\gamma$

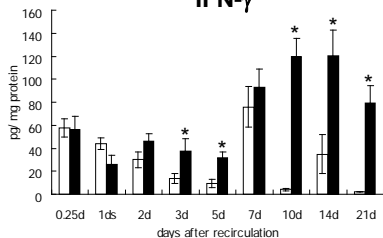

### TNF- $\alpha$

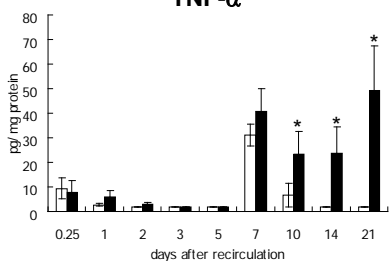

■ : 4VO  
□ : sham

Supplement: MOESM8 [file 9601540]
